# Supplementary material for: In vitro protein digestibility of different soy-based products: effects of microstructure, physico–chemical properties and protein aggregation
Source: Royal Society of Chemistry journal article supplement (doi:10.1039/d3fo02410e), 2023-01-01
Supplement: d3fo02410e1.pdf [file d3fo02410e1.pdf]

***In vitro* protein digestibility of different soy-based products: Effect of  
microstructure, physico-chemical properties and protein aggregation**

Mengdi Li <sup>a, c</sup>, Jing Wang <sup>a</sup>, Jiayu Zhang <sup>a</sup>, Ying Lv <sup>a, \*</sup>, Shuntang Guo <sup>b</sup>, Paul Van der Meeren <sup>c</sup>

<sup>a</sup> Beijing Laboratory for Food Quality and Safety; Key Laboratory of Agricultural Product Detection and Control for Spoilage Organisms and Pesticides; Food Science and Engineering College, Beijing University of Agriculture, Beijing, 102206, China;

<sup>b</sup> Beijing Key Laboratory of Plant Protein and Cereal Processing, College of Food Science and Nutritional Engineering, China Agricultural University, Beijing 100083, China;

<sup>c</sup> Particle and Interfacial Technology Group (PaInT), Department of Green Chemistry and Technology, Faculty of Bioscience Engineering, Ghent University, Coupure Links 653, 9000, Ghent, Belgium.

**\*Corresponding author:**

Ying Lv, Food Science and Engineering College, Beijing University of Agriculture, Beijing, 102206, China. Tel and Fax: +86-10-80799170. E-mail: [lvying@bua.edu.cn](mailto:lvying@bua.edu.cn).

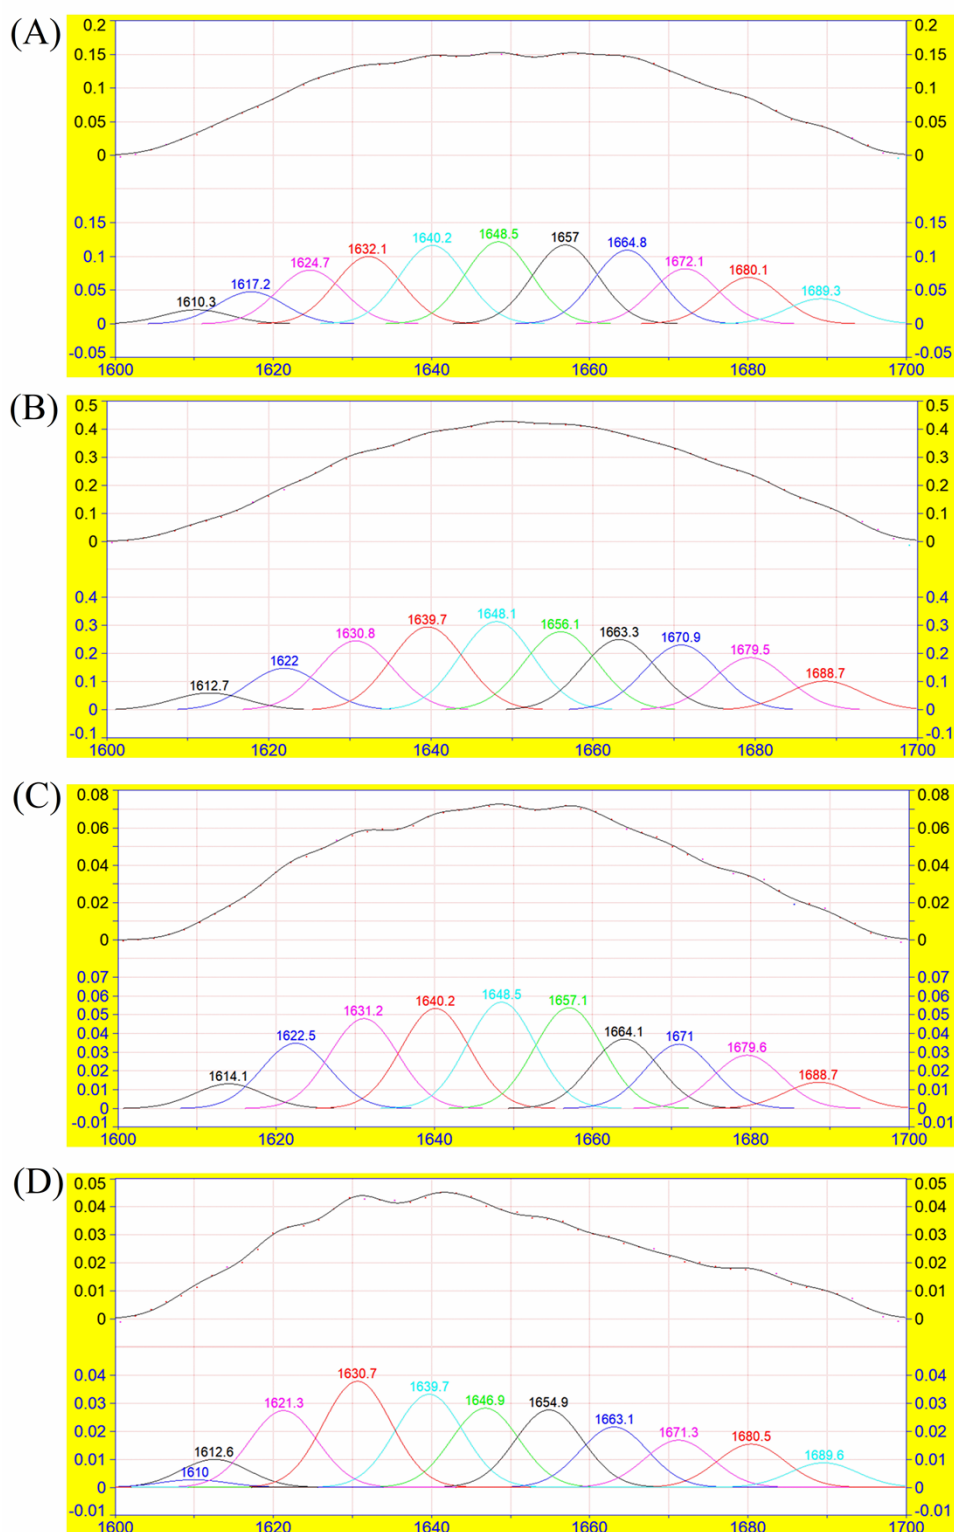

**Fig. S1.** The deconvolution of amide I spectra and curve-fitted individual component bands of the amide I region in fourier transform infrared (FTIR) spectra ( $1600 - 1700 \text{ cm}^{-1}$ ) of the four samples. (A) soy drink; (B) reconstituted soy drink powder; (C) tofu; (D) yuba.

**Table S1.** Lipid, protein, ash content and 7S/11S protein ratio in the four soy products.

|                     | Soy drink                 | Reconstituted soy<br>drink powder | Tofu                      | Yuba                      |
|---------------------|---------------------------|-----------------------------------|---------------------------|---------------------------|
| Lipid (%)           | 1.65 ± 0.05 <sup>a</sup>  | 13.20 ± 0.10 <sup>c</sup>         | 3.70 ± 0.10 <sup>b</sup>  | 34.80 ± 0.40 <sup>d</sup> |
| Protein (%)         | 4.19 ± 0.02 <sup>a</sup>  | 51.10 ± 0.23 <sup>c</sup>         | 14.91 ± 0.11 <sup>b</sup> | 57.50 ± 0.30 <sup>d</sup> |
| Ash (%)             | 0.41 ± 0.03 <sup>a</sup>  | 4.120 ± 0.12 <sup>c</sup>         | 0.47 ± 0.11 <sup>a</sup>  | 2.18 ± 0.06 <sup>b</sup>  |
| Ratio of 7S/11S (%) | 31.20 ± 0.60 <sup>a</sup> | 34.30 ± 3.60 <sup>a</sup>         | 30.40 ± 2.30 <sup>a</sup> | 32.50 ± 2.00 <sup>a</sup> |

Values within the same row with no superscript letter in common represent a significant difference (means ± SD,  $p < 0.05$ ).
